# Supplementary material
Source: publisher site journal article supplement (https://www.dovepress.com/article/331658)
Supplement: Supplementary file 1 [file get_supplementary_file.php]

**Supplementary Table 1:** Patient characteristics in the drop-out and the per protocol population.

| Variable | N=9  drop-outs | N = 23  per protocol population | p |
| --- | --- | --- | --- |
| Men, No (%) | 4 (44) | 11 (48) | 0.31 |
| Women, No (%) | 5 (56) | 12 (52) | 0.31 |
| Age, years | 63.5 (5.9) | 66.0 (5.3) | 0.47 |
| Body Mass Index, kg/m2 | 27.3 (6.2) | 25.1 (3.7) | 0.34 |
| FEV1, liters | 1.7 (0.9) | 1.7 (0.5) | 0.86 |
| FEV1, % predicted | 53 (15) | 62 (14) | 0.14 |
| FVC, liters | 3.4 (1.2) | 3.2 (0.7) | 0.51 |
| FVC, % predicted | 81 (12) | 90 (12) | 0.09 |
| FEV1 / FVC, absolute value | 0.5 (0.2) | 0.5 (0.1) | 0.58 |
| TLCO (Hb), mmol/min/kPa | 5.4 (3.0) | 5.7 (2.0) | 0.74 |
| TLCO (Hb), % predicted | 59 (23) | 70 (20) | 0.23 |
| GOLD grade 2, No (%) | 7 (78) | 18 (78) | 0.98 |

Continuous variables are presented as mean (SD) and categorical variables are presented as numbers (%). ACEI = angiotensin-converting enzyme inhibitors; ARB = angiotensin receptor blockers; FEV1 = forced expiratory volume in the first second of expiration; FVC = forced vital capacity; TLco = transfer factor of the lung for carbon monoxide; GOLD = Global Obstructive Lung Disease classification.

**Supplementary Table 2**: Sleep study parameters in the per protocol population,

| Sleep parameter | 490 m | 2048 m placebo | 2048 m NOT |
| --- | --- | --- | --- |
| AHI, /h | 19.7 (13.9) | 36.1 (27.9) | 13.8 (17.7) |
| ODI, /h | 9.3 (11.7) | 40.0 (28.5) | 4.5 (11.0) |
| Nocturnal SpO2, % | 92 (2) | 86.2 (3.1) | 97 (1.8) |
| TST90, % | 12.5 (19.0) | 77.4 (27.7) | 0.8 (2.7) |
| AI, /h | 13.7 (8.8) | 18.7 (16.3) | 14.5 (10.2) |

Data are presented as mean (SD). AHI = apnea-hypopnea-index; ODI = oxygen-desaturation-index, TST90 = total sleep time with SpO2 < 90%; AI = arousal-index.
